# Supplementary material
Source: PubMed Central journal article supplement (PMC2852886)

## SUPPLEMENTARY DATA

### CHARACTERIZATION OF MYELIN LIGAND COMPLEXES WITH THE NEURONAL NOGO-66 RECEPTOR FAMILY

Juha Laurén<sup>‡</sup>, Fenghua Hu<sup>‡</sup>, Joanna Chin<sup>‡</sup>, Ji Liao<sup>‡</sup>, Matti S. Airaksinen<sup>§</sup> and Stephen M. Strittmatter<sup>‡1</sup>

From the <sup>‡</sup>Departments of Neurology and Neurobiology, Yale University School of Medicine, 333 Cedar Street, New Haven, Connecticut 06520 and <sup>§</sup>Neuroscience Center, Viikinkaari 4B (PO Box 56), 00014 University of Helsinki, Helsinki, Finland.

Running Title: NgR family ligand interactions

<sup>1</sup> Correspondence should be addressed to Stephen M. Strittmatter, Department of Neurology, Yale University School of Medicine, 333 Cedar Street, New Haven, Connecticut 06520, Tel 203-785-4878, FAX 203-785-5098, Email: [stephen.strittmatter@yale.edu](mailto:stephen.strittmatter@yale.edu)

### FIGURE LEGENDS

**Supplementary Figure 1. Reticulons possess unique expression patterns in the cerebellum, thus confirming the specificity of *in situ* hybridization signal.** Analysis in sagittal sections of adult mouse cerebellum demonstrates non-identical expression pattern of Rtn1 (A, B), Rtn2 (C, D), Rtn3 (E, F), and Rtn4 (G, H) mRNAs. Shown are bright-field images counterstained with hematoxylin (A, C, E, G), and corresponding dark-field autoradiographs (B, D, F, H). Scale bar in (H) is 100  $\mu$ m.

**Supplementary Figure 2. Proteolytic degradation of different Nogo-66 preparations.** Conditioned media from non-transfected (MOCK) or from HEK293T cells transfected with pAPtag5 plasmid (alkaline phosphatase (AP) alone), pcAP-5-Nogo-66 (old construct described in (6)) or pAPtag5-Nogo-66 (new construct; this work) was separated by SDS-PAGE and analyzed by Western blotting using anti-AP antibody (Sigma). Prominent degradation of pcAP-5-Nogo-66 expression vector –derived AP-Nogo66 recombinant protein is observed.

### REFERENCE

1. Fournier, A. E., GrandPre, T., and Strittmatter, S. M. (2001) Nature 409(6818), 341-346

**Supplementary Fig. 1**

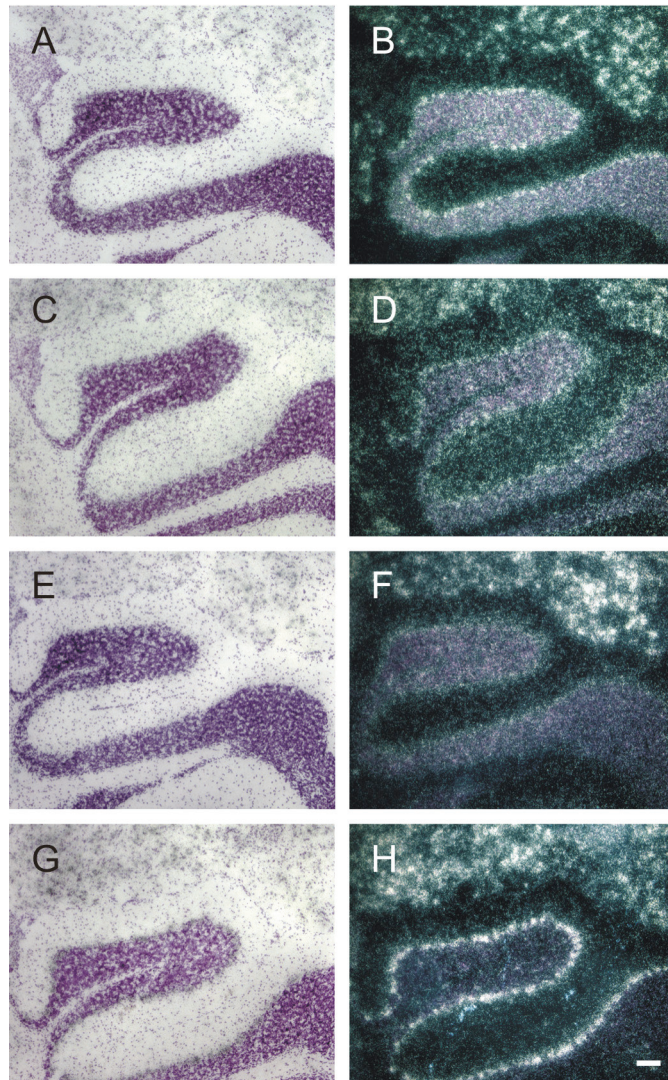

Supplementary Fig. 2

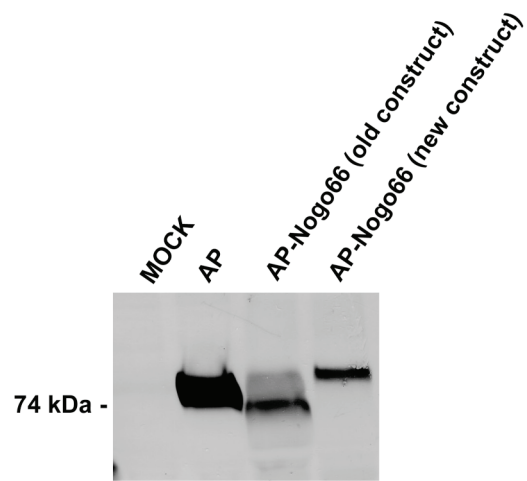

Supplement: NIHMS188038-supplement-supplement_1.pdf [file NIHMS188038-supplement-supplement_1.pdf]
